# Supplementary material
Source: PubMed Central journal article supplement (PMC5152685)
Supplement: NIHMS748259-supplement-4.pdf [file NIHMS748259-supplement-4.pdf]

# Supplementary Figure 1 (Ikeda Y et al)

(a)

| Gene              | Disease                                           | Number of rare variants |          | Samples |   |   |   |   |   |   |   |     |       |    |    |    |    |  |
|-------------------|---------------------------------------------------|-------------------------|----------|---------|---|---|---|---|---|---|---|-----|-------|----|----|----|----|--|
|                   |                                                   | Cases                   | Controls | 1       | 2 | 3 | 4 | 5 | 6 | 7 | 8 | 9   | 10    | 11 | 12 | 13 | 14 |  |
| <i>PTEN</i>       |                                                   | 0                       | 0        |         |   |   |   |   |   |   |   |     |       |    |    |    |    |  |
| <i>KLLN</i>       | Cowden syndrome                                   | 0                       | 0        |         |   |   |   |   |   |   |   |     |       |    |    |    |    |  |
| <i>SDHB</i>       |                                                   |                         | 0        | 1       |   |   |   |   |   |   |   |     |       |    |    |    |    |  |
| <i>SDHC</i>       | Hereditary paraganglioma / Pheochromocytoma       | 0                       | 2        |         |   |   |   |   |   |   |   |     |       |    |    |    |    |  |
| <i>SDHD</i>       |                                                   |                         | 0        | 1       |   |   |   |   |   |   |   |     |       |    |    |    |    |  |
| <i>BRCA1</i>      | Hereditary breast and ovarian cancer syndrome     | 1                       | 20       |         |   |   |   |   |   |   |   | # 1 |       |    |    |    |    |  |
| <i>BRCA2</i>      |                                                   |                         | 2        | 41      |   |   |   |   |   |   |   |     | # 3,4 |    |    |    |    |  |
| <i>CDKN2A</i>     | Familial atypical multiple mole melanoma syndrome | 0                       | 6        |         |   |   |   |   |   |   |   |     |       |    |    |    |    |  |
| <i>MLH1</i>       | Lynch syndrome                                    | 0                       | 11       |         |   |   |   |   |   |   |   |     |       |    |    |    |    |  |
| <i>MSH2</i>       |                                                   | 1                       | 4        |         |   |   |   |   |   |   |   | # 2 |       |    |    |    |    |  |
| <i>MSH6</i>       |                                                   | 0                       | 13       |         |   |   |   |   |   |   |   |     |       |    |    |    |    |  |
| <i>PMS2</i>       |                                                   | 0                       | 8        |         |   |   |   |   |   |   |   |     |       |    |    |    |    |  |
| <i>APC</i>        | Familial adenomatous polyposis                    | 0                       | 40       |         |   |   |   |   |   |   |   |     |       |    |    |    |    |  |
| <i>MUTYH</i>      |                                                   |                         | 0        | 9       |   |   |   |   |   |   |   |     |       |    |    |    |    |  |
| <i>STK1(LKB1)</i> | Peutz-Jeghers syndrome                            | 0                       | 0        |         |   |   |   |   |   |   |   |     |       |    |    |    |    |  |
| <i>CDH1</i>       | Hereditary diffuse gastric cancer                 | 1                       | 5        |         |   |   |   |   |   |   |   |     | # 5   |    |    |    |    |  |
| <i>TP53</i>       | Li-Fraumeni syndrome                              | 0                       | 4        |         |   |   |   |   |   |   |   |     |       |    |    |    |    |  |
| <i>VHL</i>        | Von Hippel Li syndrome                            | 0                       | 1        |         |   |   |   |   |   |   |   |     |       |    |    |    |    |  |
| <i>RB1</i>        | Retinoblastoma                                    | 0                       | 12       |         |   |   |   |   |   |   |   |     |       |    |    |    |    |  |

 Mutation

(b)

|        | Gene | Mutation            | Polyphen2 HumDiv                                                                    | LRT score | MutationTaster | Polyphen2 HumVar                                                                      | SIFT                                                                                  |
|--------|------|---------------------|-------------------------------------------------------------------------------------|-----------|----------------|---------------------------------------------------------------------------------------|---------------------------------------------------------------------------------------|
| Case9  | #1   | <i>BRCA1</i> L523M  |  |           |                |  |  |
|        | #2   | <i>MSH2</i> I169V   |                                                                                     |           |                |                                                                                       |                                                                                       |
| Case10 | #3   | <i>BRCA2</i> N1228D |  |           |                |                                                                                       |                                                                                       |
|        | #4   | <i>BRCA2</i> R2034C |  |           |                |  |  |
| Case11 | #5   | <i>CDH1</i> G693S   |                                                                                     |           |                |                                                                                       |                                                                                       |

 deleterious
