# Supplementary material
Source: PubMed Central journal article supplement (PMC5152685)
Supplement: NIHMS748259-supplement-5.pdf [file NIHMS748259-supplement-5.pdf]

# Supplementary Figure 2 (Ikeda Y et al)

| Cancer type    | Recurrently mutated genes* | Frequency in COSMIC database (%) | Number of rare variants |          | Samples |   |   |   |   |   |   |   |   |    |    |    |    |    |
|----------------|----------------------------|----------------------------------|-------------------------|----------|---------|---|---|---|---|---|---|---|---|----|----|----|----|----|
|                |                            |                                  | Cases                   | Controls | 1       | 2 | 3 | 4 | 5 | 6 | 7 | 8 | 9 | 10 | 11 | 12 | 13 | 14 |
| Thyroid Cancer | <i>BRAF</i>                | 51%                              | 0                       | 0        |         |   |   |   |   |   |   |   |   |    |    |    |    |    |
|                | <i>RET</i>                 | 26%                              | 0                       | 11       |         |   |   |   |   |   |   |   |   |    |    |    |    |    |
|                | <i>TERT</i>                | 13%                              | 0                       | 0        |         |   |   |   |   |   |   |   |   |    |    |    |    |    |
| Breast Cancer  | <i>PIK3CA</i>              | 26%                              | 0                       | 0        |         |   |   |   |   |   |   |   |   |    |    |    |    |    |
|                | <i>TP53</i>                | 23%                              | 0                       | 4        |         |   |   |   |   |   |   |   |   |    |    |    |    |    |
|                | <i>CDH1</i>                | 11%                              | 1                       | 5        |         |   |   |   |   |   |   |   |   |    |    |    |    |    |

Mutation
 \* COSMIC database (more than 10%)
