# Supplementary material
Source: PubMed Central journal article supplement (PMC5152685)
Supplement: NIHMS748259-supplement-6.pdf [file NIHMS748259-supplement-6.pdf]

# Supplementary figure 3 (Ikeda Y et al)

| Gene                  | Amino acid size | Number of rare variants |          | Odds ratio | P-value | Samples |   |   |   |   |   |   |   |   |    |    |    |    |    |
|-----------------------|-----------------|-------------------------|----------|------------|---------|---------|---|---|---|---|---|---|---|---|----|----|----|----|----|
|                       |                 | Cases                   | Controls |            |         | 1       | 2 | 3 | 4 | 5 | 6 | 7 | 8 | 9 | 10 | 11 | 12 | 13 | 14 |
| <i>HLA-DRB1</i>       | 266             | 9                       | 13       | 9.0        | 1.0E-05 |         |   |   |   |   |   |   |   |   |    |    |    |    |    |
| <i>HLA-DRB5</i>       | 266             | 12                      | 0        | 311.3      | 1.0E-05 |         |   |   |   |   |   |   |   |   |    |    |    |    |    |
| <i>LYZL2</i>          | 194             | 8                       | 8        | 13.0       | 1.0E-05 |         |   |   |   |   |   |   |   |   |    |    |    |    |    |
| <i>MLL3</i>           | 4911            | 27                      | 47       | 7.5        | 1.0E-05 |         |   |   |   |   |   |   |   |   |    |    |    |    |    |
| <i>PABPC1</i>         | 636             | 42                      | 26       | 21.1       | 1.0E-05 |         |   |   |   |   |   |   |   |   |    |    |    |    |    |
| <i>PABPC3</i>         | 631             | 15                      | 14       | 13.9       | 1.0E-05 |         |   |   |   |   |   |   |   |   |    |    |    |    |    |
| <i>PPIAL4G</i>        | 164             | 7                       | 0        | 181.4      | 1.0E-05 |         |   |   |   |   |   |   |   |   |    |    |    |    |    |
| <i>PRSS3</i>          | 304             | 12                      | 5        | 31.1       | 1.0E-05 |         |   |   |   |   |   |   |   |   |    |    |    |    |    |
| <i>TPSAB1</i>         | 275             | 4                       | 1        | 51.8       | 2.0E-05 |         |   |   |   |   |   |   |   |   |    |    |    |    |    |
| <i>ZNF141</i>         | 474             | 13                      | 7        | 24.1       | 1.0E-05 |         |   |   |   |   |   |   |   |   |    |    |    |    |    |
| <i>ZNF699</i>         | 642             | 5                       | 2        | 32.4       | 1.0E-05 |         |   |   |   |   |   |   |   |   |    |    |    |    |    |
| <i>PARP4</i>          | 1724            | 6                       | 15       | 5.2        | 1.0E-05 |         |   |   |   |   |   |   |   |   |    |    |    |    |    |
| <i>PSME4</i>          | 1843            | 7                       | 9        | 10.1       | 1.0E-05 |         |   |   |   |   |   |   |   |   |    |    |    |    |    |
| <i>REG3A</i>          | 175             | 4                       | 2        | 25.9       | 1.0E-05 |         |   |   |   |   |   |   |   |   |    |    |    |    |    |
| <i>SPATA31E1</i>      | 1445            | 6                       | 16       | 4.9        | 2.0E-05 |         |   |   |   |   |   |   |   |   |    |    |    |    |    |
| <i>ZNF600</i>         | 722             | 4                       | 3        | 17.3       | 1.0E-05 |         |   |   |   |   |   |   |   |   |    |    |    |    |    |
| <i>ZNF727</i>         | 499             | 4                       | 3        | 17.3       | 4.0E-05 |         |   |   |   |   |   |   |   |   |    |    |    |    |    |
| <i>TNK2</i>           | 1038            | 6                       | 3        | 25.9       | 1.0E-05 |         |   |   |   |   |   |   |   |   |    |    |    |    |    |
| <i>FAM8A1</i>         | 413             | 6                       | 0        | 155.4      | 4.0E-05 |         |   |   |   |   |   |   |   |   |    |    |    |    |    |
| <i>MUC17</i>          | 4493            | 19                      | 73       | 3.4        | 3.0E-05 |         |   |   |   |   |   |   |   |   |    |    |    |    |    |
| <i>VSIG8</i>          | 414             | 3                       | 1        | 38.8       | 2.0E-04 |         |   |   |   |   |   |   |   |   |    |    |    |    |    |
| <i>SIRPA</i>          | 504             | 4                       | 5        | 10.4       | 1.0E-04 |         |   |   |   |   |   |   |   |   |    |    |    |    |    |
| <i>ZNF664-FAM101A</i> | 135             | 3                       | 1        | 38.8       | 1.0E-04 |         |   |   |   |   |   |   |   |   |    |    |    |    |    |
| <i>ZNF700</i>         | 745             | 4                       | 6        | 8.6        | 1.0E-04 |         |   |   |   |   |   |   |   |   |    |    |    |    |    |
| <i>TUBB8</i>          | 444             | 3                       | 2        | 19.4       | 4.0E-04 |         |   |   |   |   |   |   |   |   |    |    |    |    |    |
| <i>TYRO3</i>          | 890             | 3                       | 2        | 19.4       | 3.0E-04 |         |   |   |   |   |   |   |   |   |    |    |    |    |    |
| <i>DVL1</i>           | 670             | 4                       | 8        | 6.5        | 3.0E-04 |         |   |   |   |   |   |   |   |   |    |    |    |    |    |
| <i>CDC34</i>          | 236             | 3                       | 3        | 12.9       | 5.0E-04 |         |   |   |   |   |   |   |   |   |    |    |    |    |    |
| <i>PTK2</i>           | 1052            | 5                       | 10       | 6.5        | 7.0E-04 |         |   |   |   |   |   |   |   |   |    |    |    |    |    |
| <i>HIST1H2BE</i>      | 126             | 2                       | 0        | 51.8       | 8.0E-04 |         |   |   |   |   |   |   |   |   |    |    |    |    |    |
| <i>MDC1</i>           | 2089            | 2                       | 12       | 7.6        | 1.0E-03 |         |   |   |   |   |   |   |   |   |    |    |    |    |    |
| <i>NSUN4</i>          | 384             | 2                       | 0        | 51.8       | 1.0E-03 |         |   |   |   |   |   |   |   |   |    |    |    |    |    |
| <i>BARD1</i>          | 777             | 2                       | 0        | 51.8       | 1.0E-03 |         |   |   |   |   |   |   |   |   |    |    |    |    |    |
| <i>HID1</i>           | 788             | 2                       | 0        | 51.8       | 9.0E-04 |         |   |   |   |   |   |   |   |   |    |    |    |    |    |

 Mutation
